# Supplementary material
Source: MDPI journal article supplement (https://www.mdpi.com/2227-9040/11/3/169)
Supplement: s1 [file s1 › chemosensors-2202102-supplementary.pdf]

# *Supplementary Material*

## **Methylene blue-Modified Biochar from Sugarcane for the Simultaneous Electrochemical Detection of Four DNA Bases**

Qusai Hassan,<sup>†‡</sup> Zhixin Meng<sup>†</sup>, Meissam Noroozifar<sup>†</sup>, Kagan Kerman<sup>†‡</sup>

<sup>†</sup>Dept. of Physical and Environmental Sciences, University of Toronto Scarborough, 1265 Military Trail,  
Toronto, ON, M1C 1A4, Canada

<sup>‡</sup>Dept. of Chemistry, University of Toronto, 80 St. George Street, Toronto, ON, M5S 3H6, Canada

\*Corresponding author, email: kagan.kerman@utoronto.ca

Tel: +1 (416) 287-7249

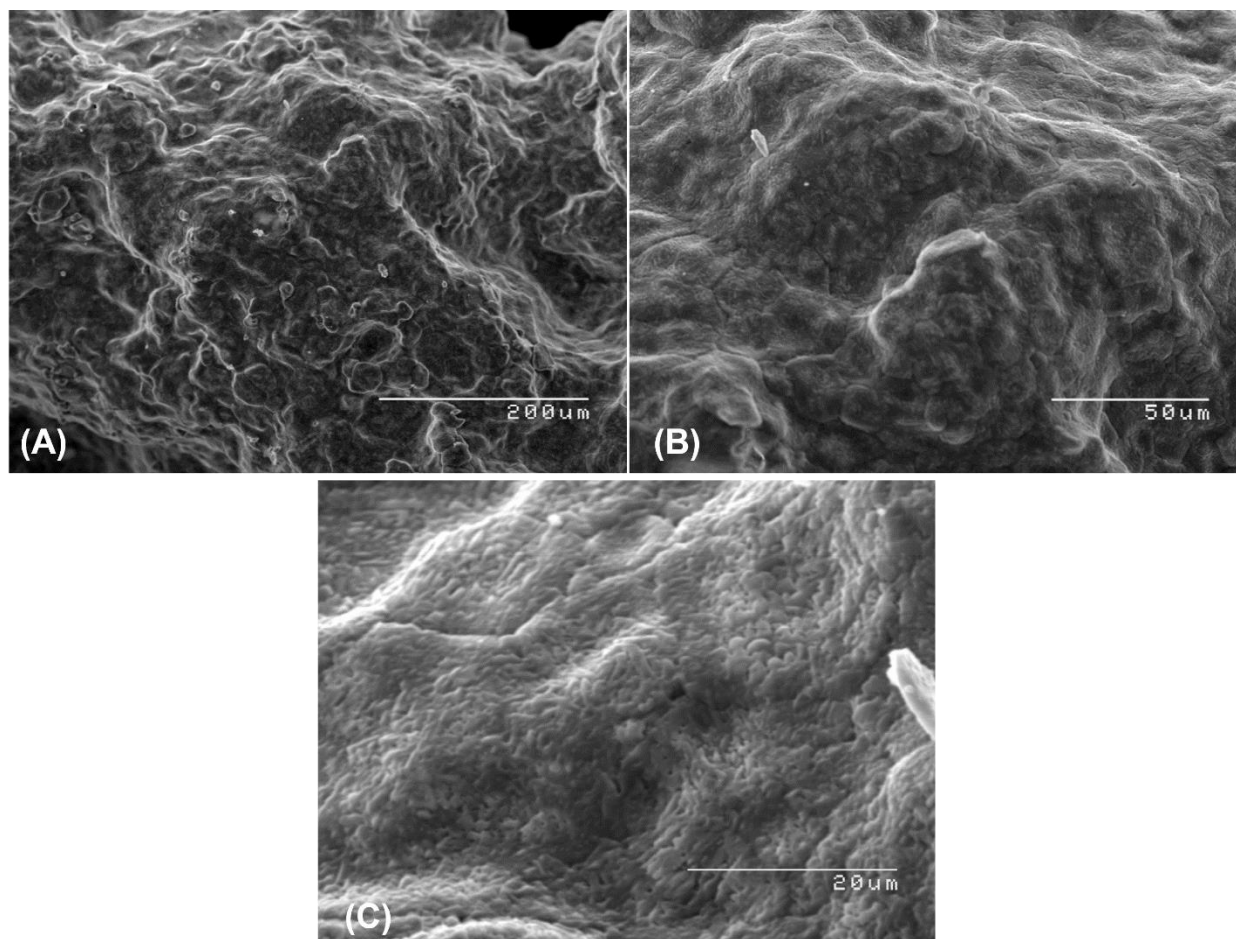

**Figure S1:** (A-C) SEM images of the SC-MB hybrid nanocomposite after grinding the intact bagasse fibres that were treated with a saturated MB solution. The scale bars in images A, B, and C are 200 μm, 50 μm, and 20 μm, respectively.

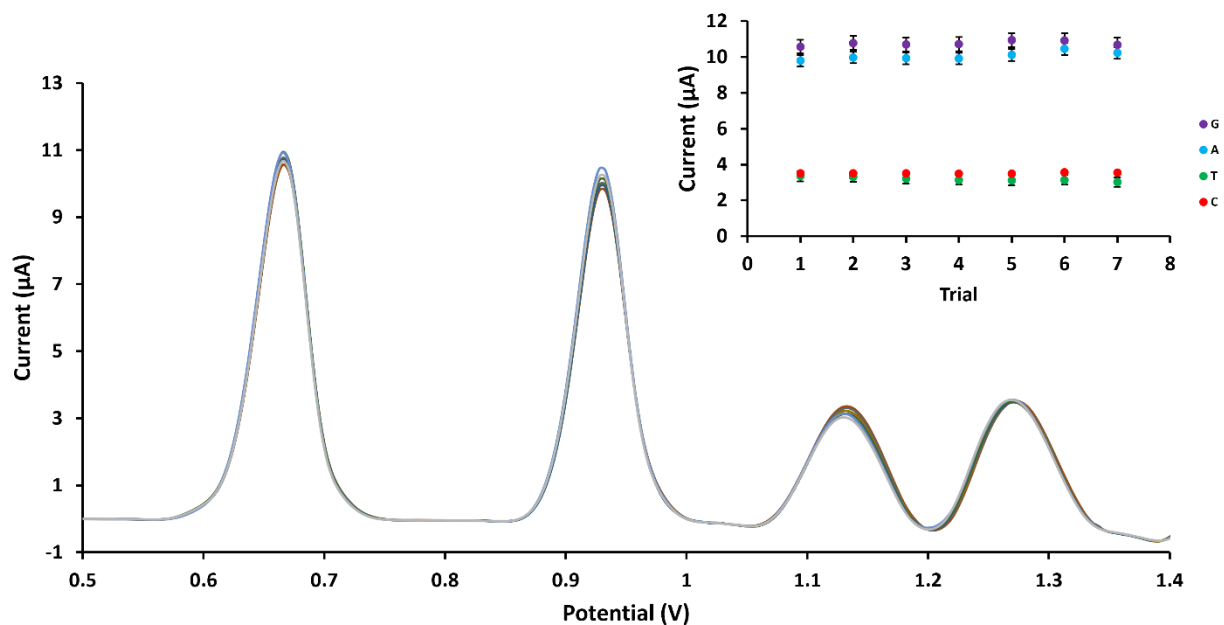

**Figure S2:** Reproducibility study with seven successive DPV measurements ( $n=7$ ) were performed while keeping the concentration of G, A, T, and C constant at 33.3, 33.3, 333.3, and 333.3  $\mu\text{M}$ , respectively. The RSD (%) calculated for G, A, T, and C were 1.3, 2.2, 3.5 and 0.7%, respectively. The inset is a plot of the peak current for each nucleotide with respect to the trial.

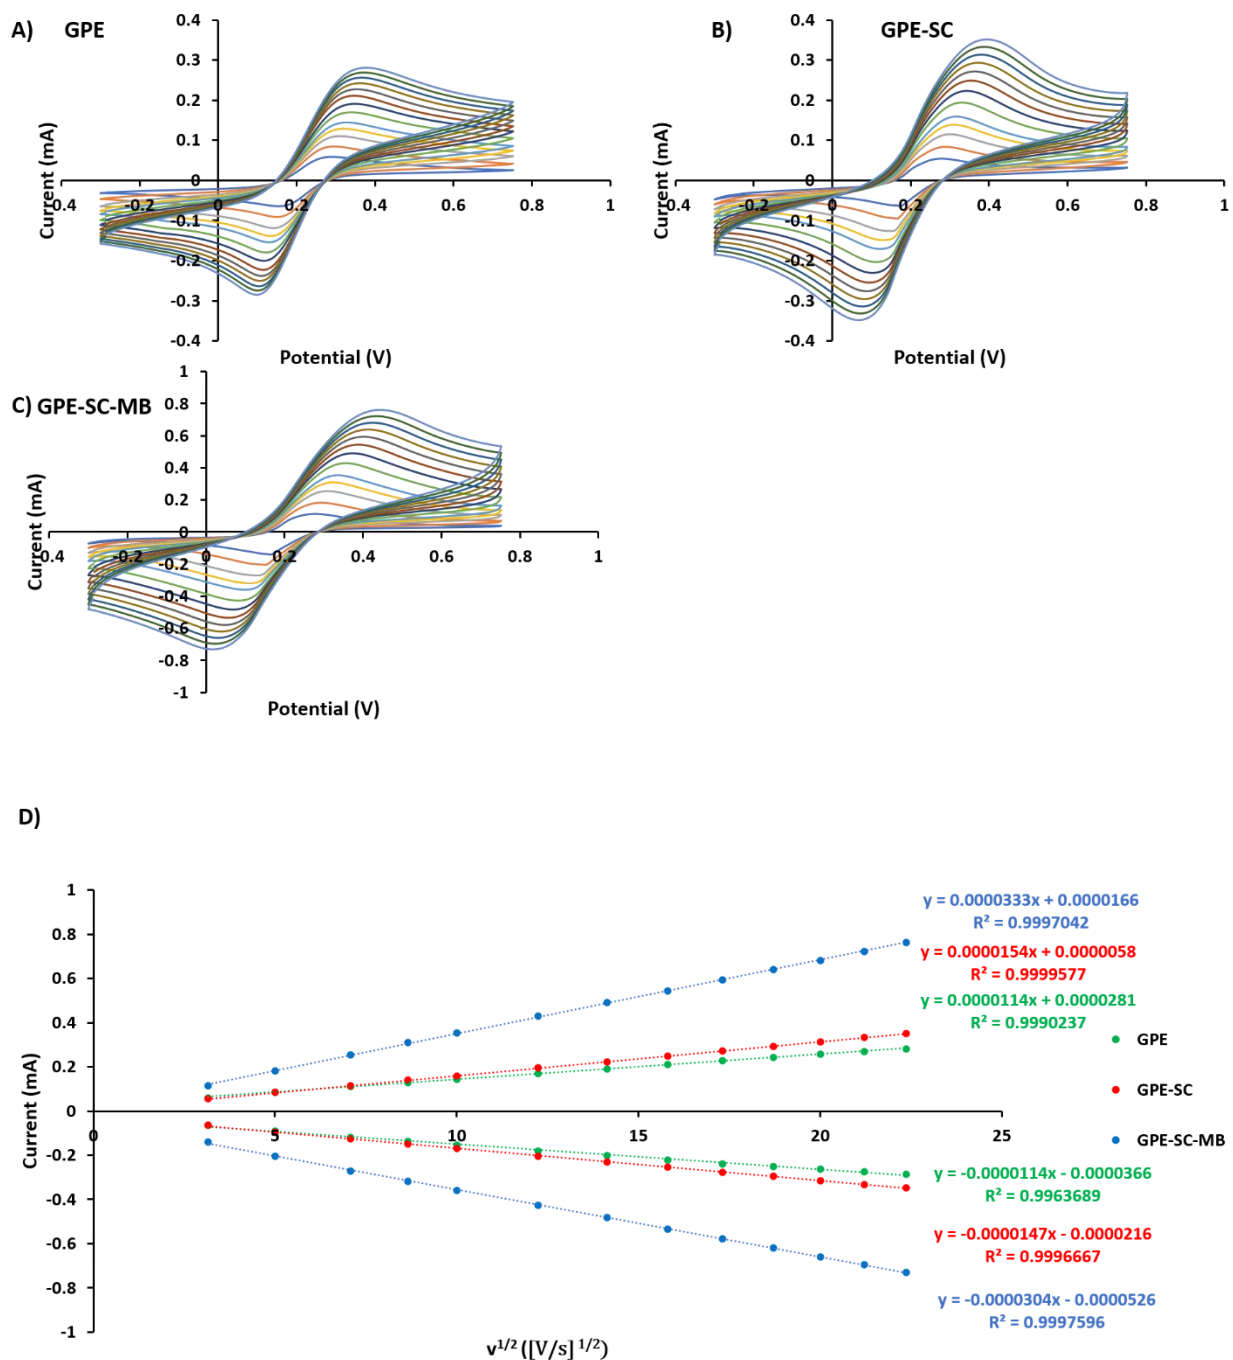

**Figure S3:** Cyclic voltammograms of (A) GPE, (B) GPE-SC, and (C) GPE-SC-MB at varying scan rates between 10 mV/s and 500 mV/s. (D) Plot of the anodic and cathodic peak current values with respect to the square root of the scan rate for the GPE (green), GPE-SC (red), and GPE-SC-MB (blue). All CVs were performed in a solution of 5 mM  $K_3Fe(CN)_6$  and 5 mM  $K_4Fe(CN)_6$  with 0.1 M KCl.

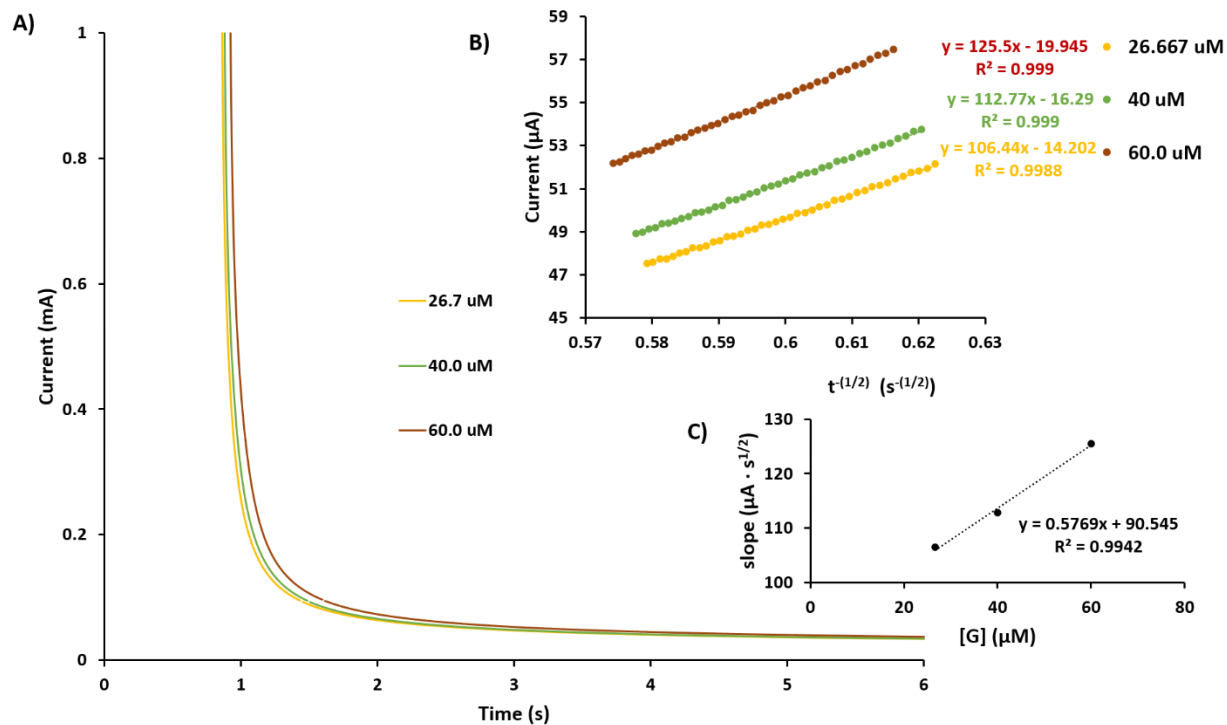

**Figure S4:** (A) Chronoamperograms of the GC-SC-MB in the presence of varying concentrations of G (26.7  $\mu\text{M}$ , 40.0  $\mu\text{M}$ , and 60.0  $\mu\text{M}$ ). (B) A plot of the current obtained from the chronoamperograms with respect to the inverse square root of time ( $1/\sqrt{s}$ ). (C) A plot of the slope from plot (B) with respect to the concentration of G.

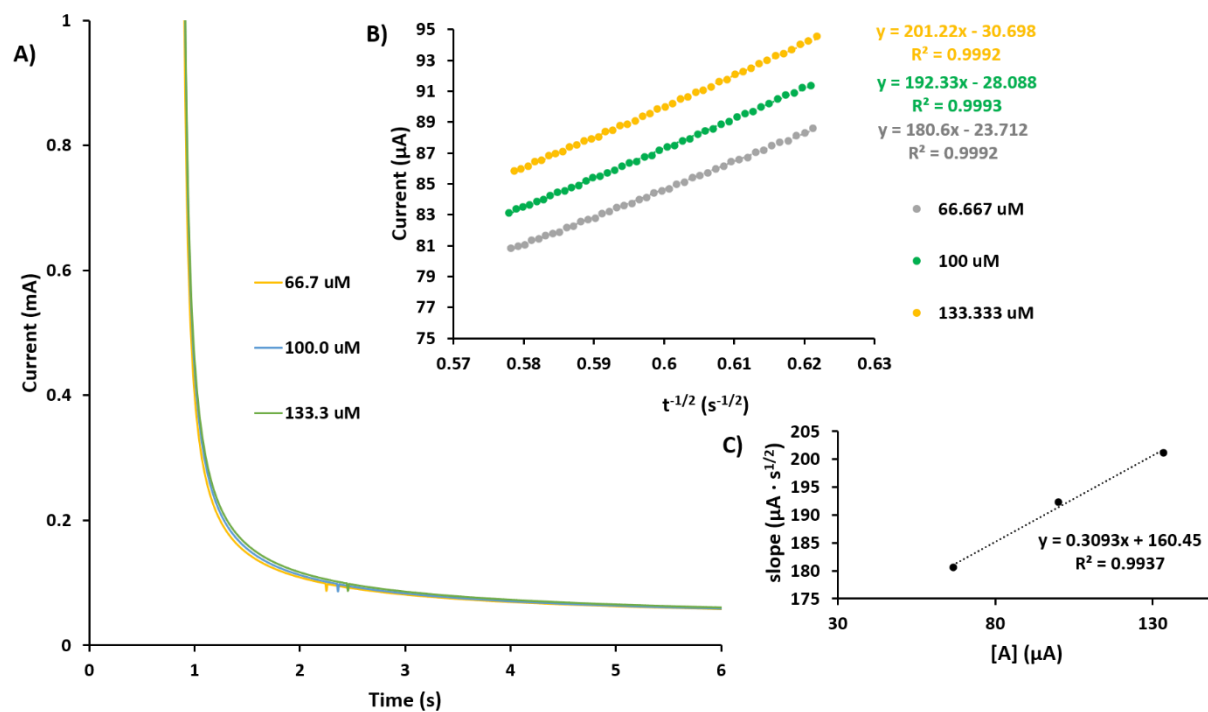

**Figure S5:** (A) Chronoamperograms of the GC-SC-MB in the presence of varying concentrations of A (66.7  $\mu\text{M}$ , 100  $\mu\text{M}$ , and 133.3  $\mu\text{M}$ ). (B) A plot of the current obtained from the chronoamperogram with respect to the inverse square root of time ( $1/\sqrt{s}$ ). (C) A plot of the slope from plot (B) with respect to the concentration of A.

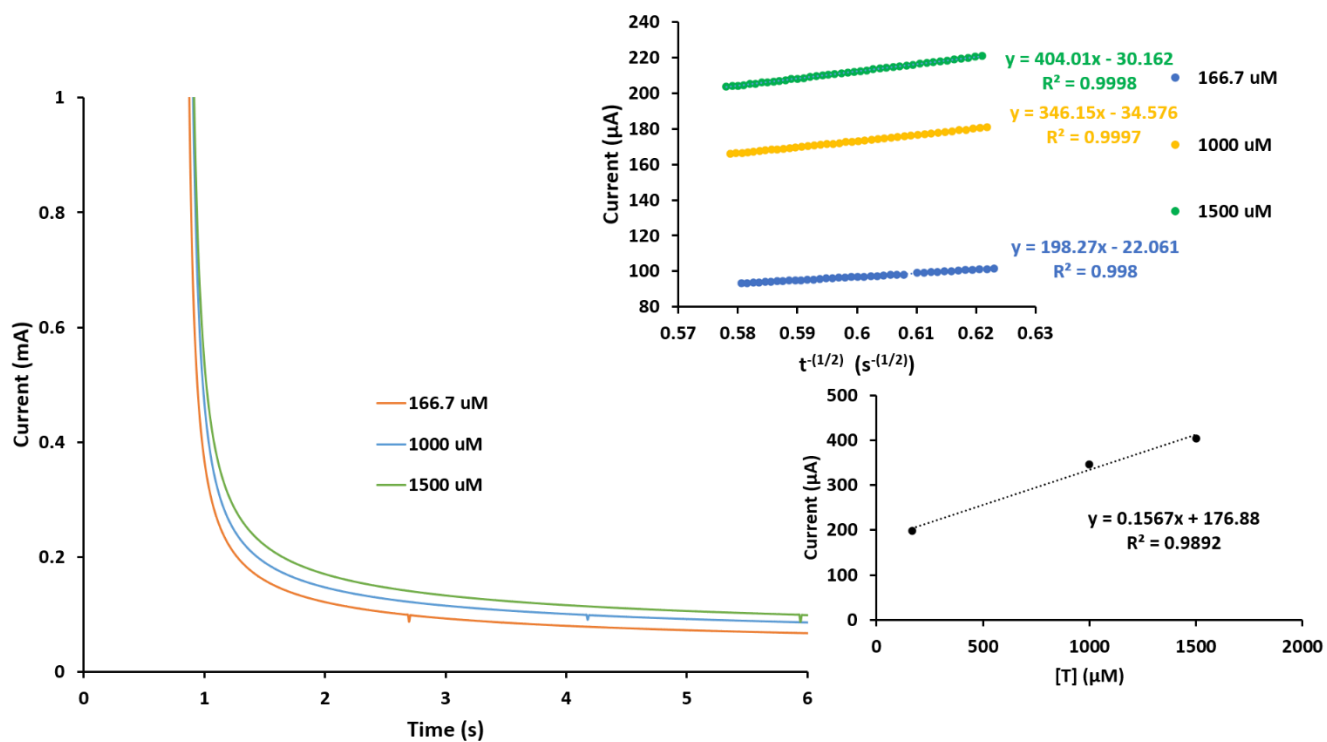

**Figure S6:** (A) Chronoamperograms of the GC-SC-MB in the presence of varying concentrations of T (166.7  $\mu\text{M}$ , 1000  $\mu\text{M}$ , and 1500  $\mu\text{M}$ ). (B) A plot of the current obtained from the chronoamperogram with respect to the inverse square root of time ( $1/\sqrt{s}$ ). (C) A plot of the slope from plot (B) with respect to the concentration of T.

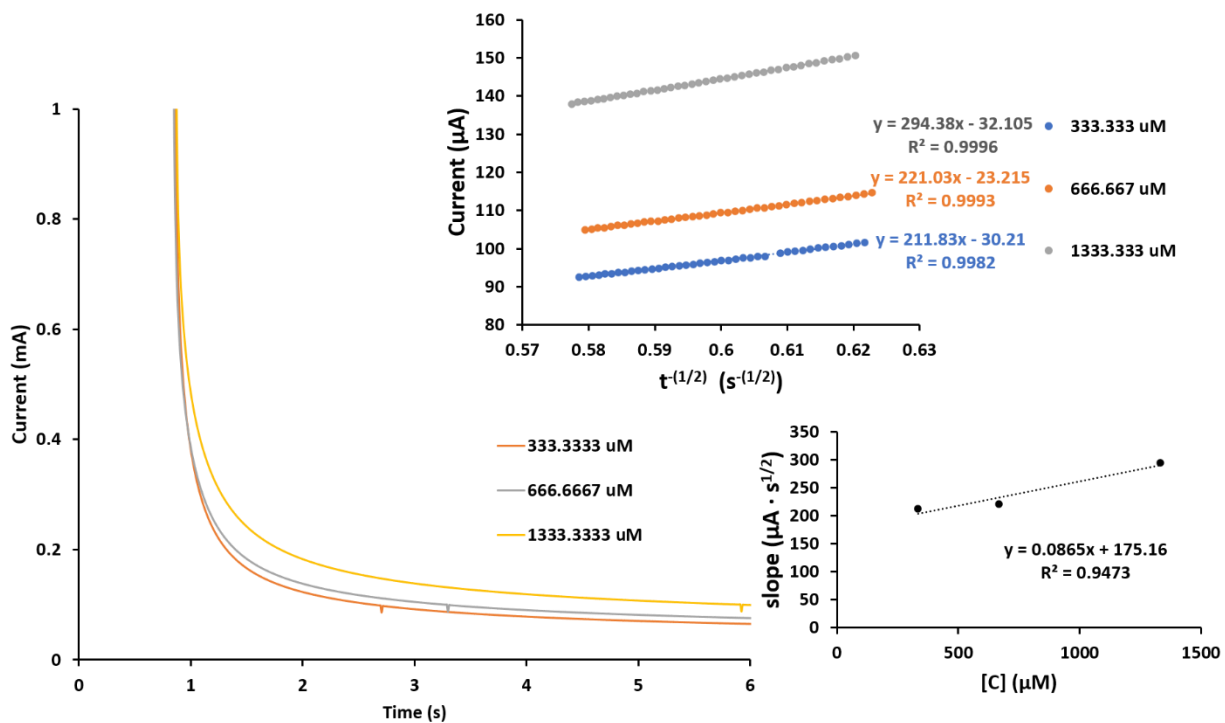

**Figure S7:** (A) Chronoamperograms of the GC-SC-MB in the presence of varying concentrations of C (333.3 μM, 666.7 μM, and 1333.3 μM). (B) A plot of the current obtained from the chronoamperogram with respect to the inverse square root of time ( $1/\sqrt{s}$ ). (C) A plot of the slope from plot (B) with respect to the concentration of T.

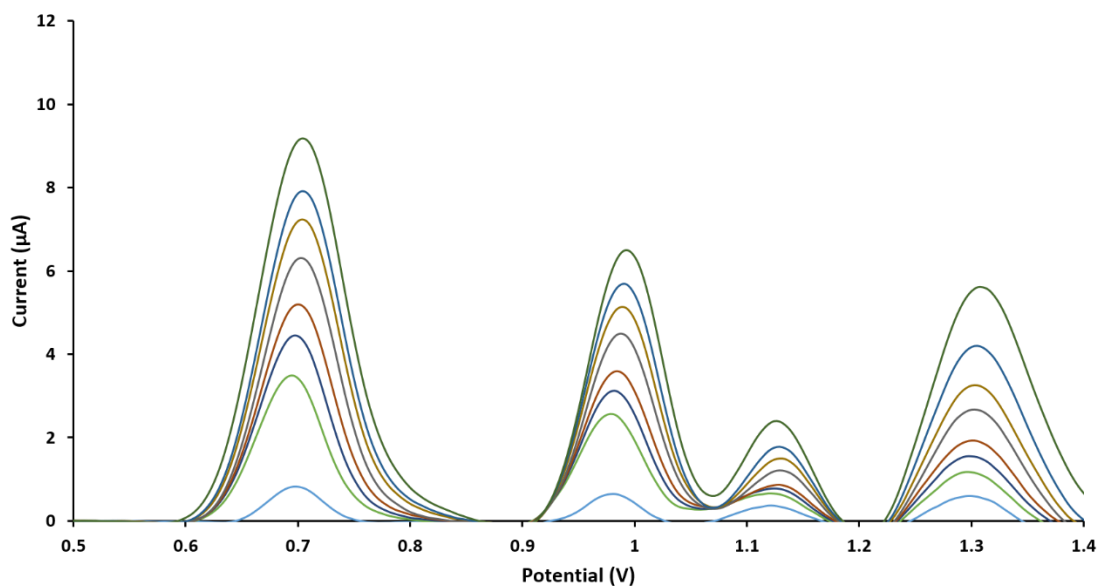

**Figure S8:** Differential pulse voltammograms showing the standard addition study of the four DNA bases in a human saliva sample (saliva was diluted 5-fold using 0.2 M PBS, pH 7.0). The concentrations ranged from 1.33 to 14.67  $\mu\text{M}$  for G and A, and from 20 to 200  $\mu\text{M}$  for T and C.
